# Supplementary material
Source: publisher figshare collection journal article supplement (https://karger.figshare.com/articles/dataset/_/4689838)

**Figure 1:** Driver diagram outlining framework for improvement

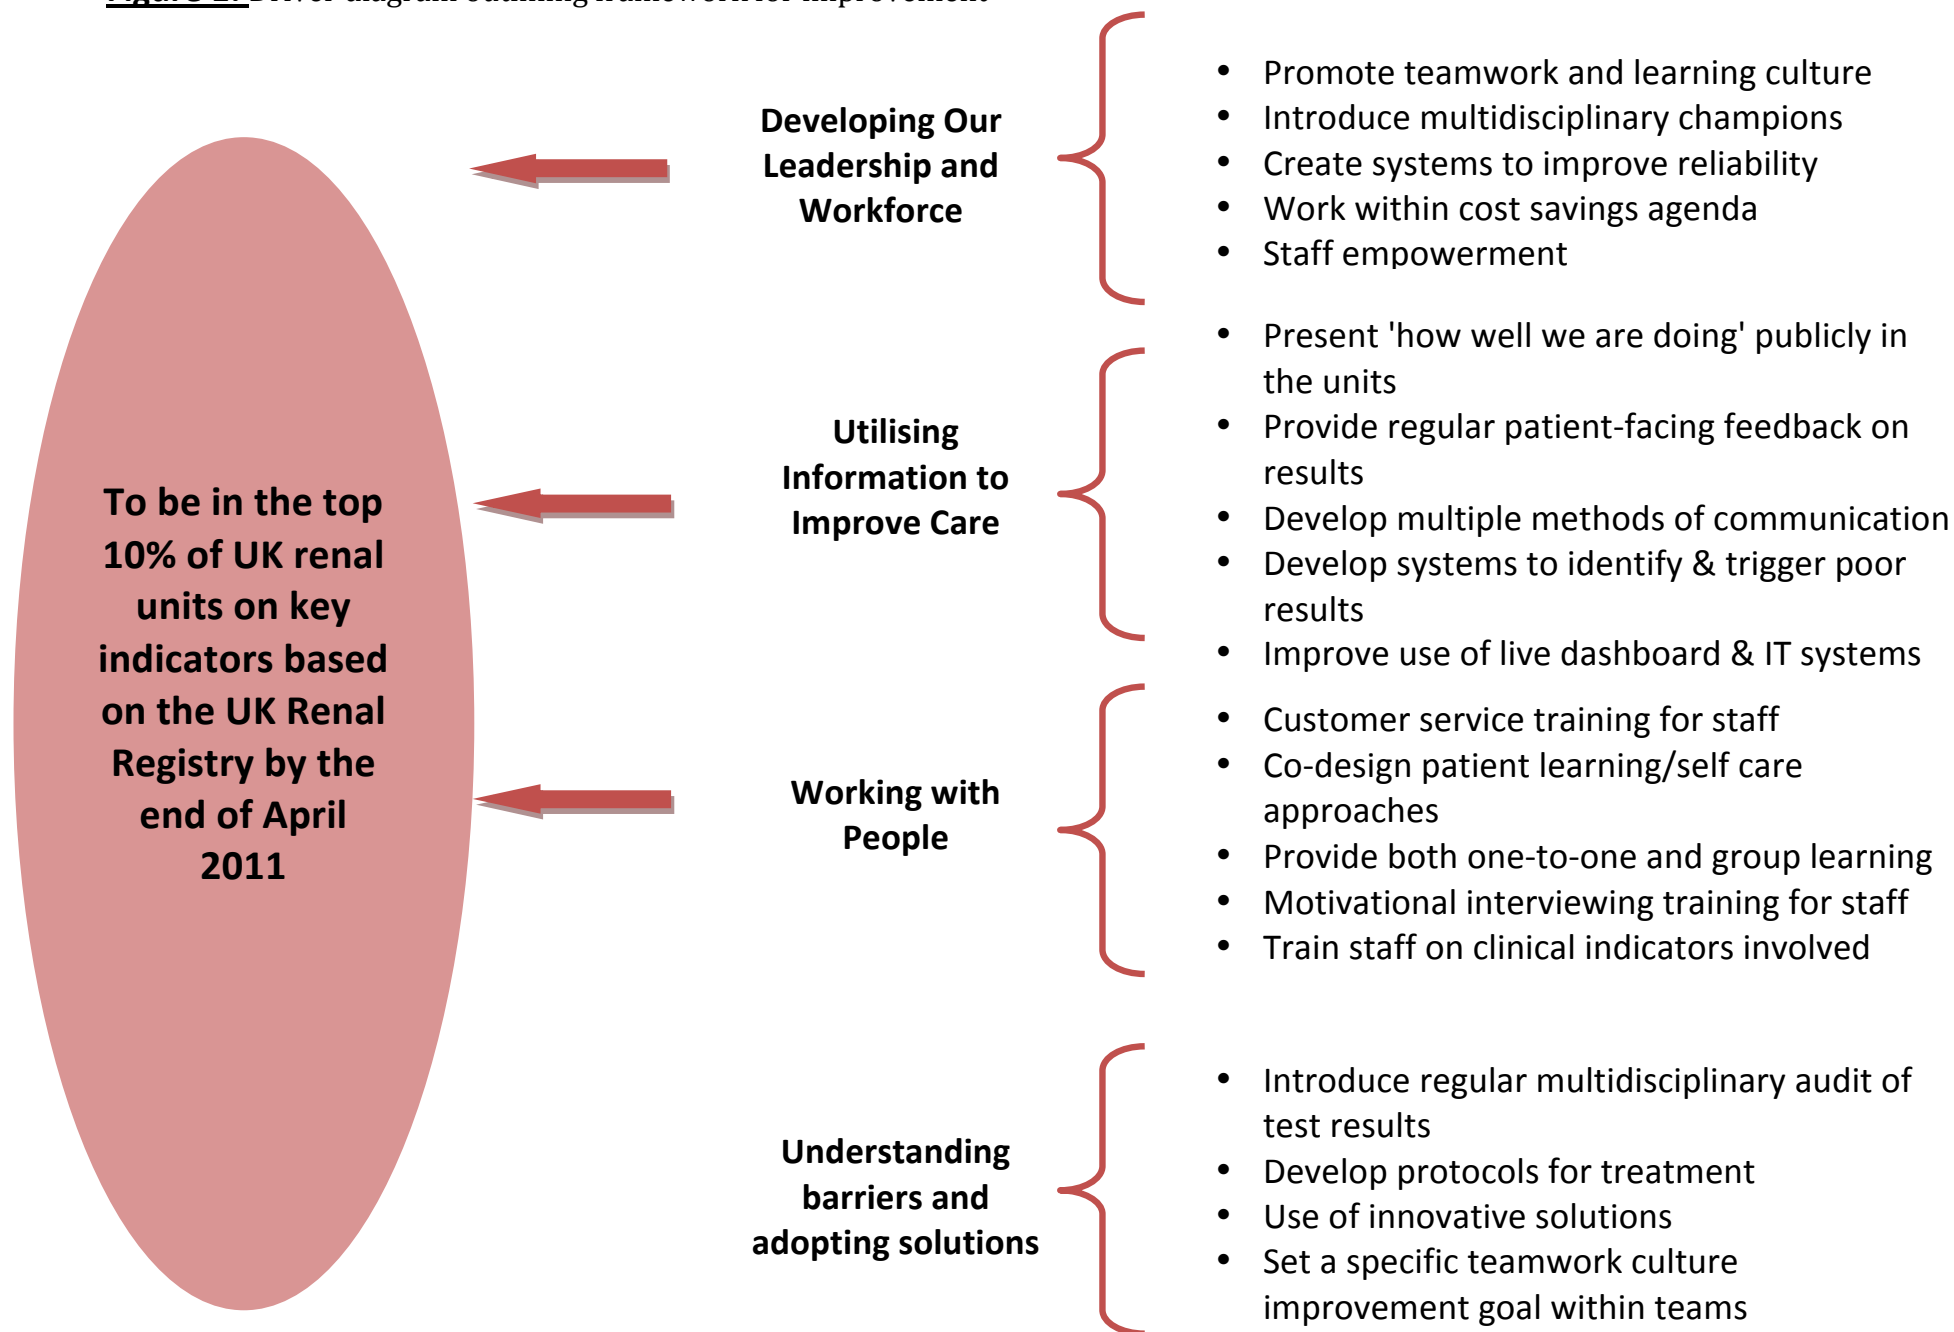

Supplement: Supplementary file 1 [file 1]
